# Supplementary material for: A simple design atomic emission spectrometer combined with multivariate image analysis for the determination of sodium content in urine
Source: Royal Society of Chemistry journal article supplement (doi:10.1039/c7ay01118k), 2017-01-01
Supplement: c7ay01118k1.pdf [file c7ay01118k1.pdf]

## Supplementary materials

### **A simple design atomic emission spectrometer combined with multivariate image analysis for the determination of sodium content in urine**

Bruno Debus<sup>1\*</sup>, Dmitry Kirsanov<sup>1,2\*</sup>, Irina Yaroshenko<sup>1,2</sup>, Andrey Legin<sup>1,2</sup>

<sup>1</sup> *Institute of Chemistry, St. Petersburg State University, St. Petersburg 199034,  
Russia*

<sup>2</sup> *Laboratory of Artificial Sensory Systems, ITMO University, St. Petersburg 197101,  
Russia*

\* Corresponding authors: b.debus87@gmail.com, d.kirsanov@gmail.com

**Fig. S1 – Standardization of the silver wire loop procedure**

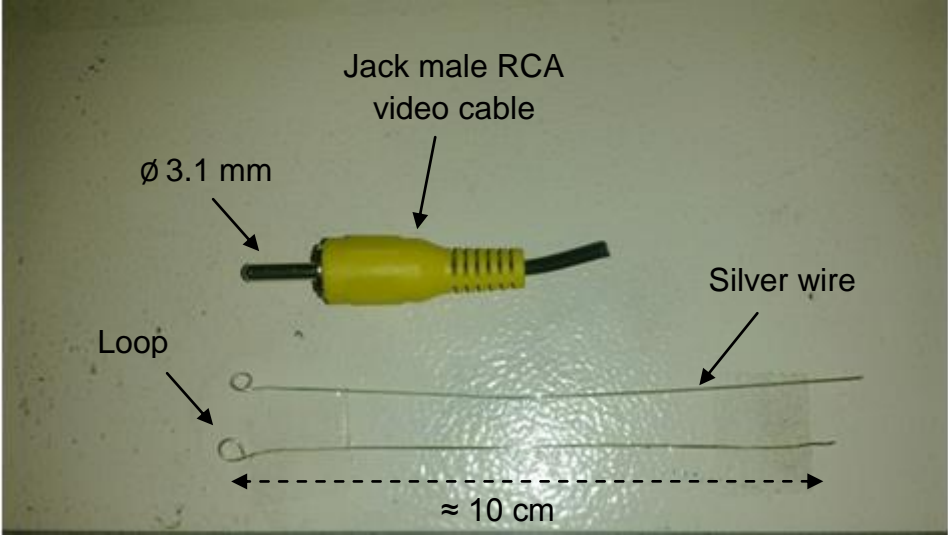

**Fig. S1 – Illustration of the method employed to design silver wire loop with constant diameter**
